# Supplementary material for: Mitochondrial dysfunction in human primary alveolar type II cells in emphysema
Source: PubMed Central journal article supplement — eBioMedicine. 2019 Aug 2;46:305–16. doi: 10.1016/j.ebiom.2019.07.063 (PMC6711885; doi:10.1016/j.ebiom.2019.07.063), 2019-08-02
Supplement: mmc1.pdf [file mmc1.pdf]

## Supplementary material

### Mitochondrial dysfunction in human primary alveolar type II cells in emphysema

Beata Kosmider<sup>1,2,3,\*</sup>, Chih-Ru Lin<sup>1,2</sup>, Loukmane Karim<sup>1,2</sup>, Dhanendra Tomar<sup>4</sup>, Liudmila Vlasenko<sup>1,2</sup>, Nathaniel Marchetti<sup>1,2</sup>, Sudhir Bolla<sup>1</sup>, Muniswamy Madesh<sup>4</sup>, Gerard J. Criner<sup>1,2</sup>, Karim Bahmed<sup>1,2,\*</sup>

<sup>1</sup>Department of Thoracic Medicine and Surgery, Temple University, Philadelphia, PA 19140

<sup>2</sup>Center for Inflammation, Translational and Clinical Lung Research, Temple University, Philadelphia, PA 19140

<sup>3</sup>Department of Physiology, Temple University, Philadelphia, PA 19140

<sup>4</sup>Medical Genetics and Molecular Biochemistry, Temple University, Philadelphia, PA 19140

\* Correspondence:

Beata Kosmider, Ph.D. or Karim Bahmed, PhD  
Department of Thoracic Medicine and Surgery  
Center for Inflammation, Translational and Clinical Lung Research  
Temple University  
3500 N. Broad Street  
Philadelphia, PA 19140  
E-mail: [beata.kosmider@temple.edu](mailto:beata.kosmider@temple.edu) or [karim.bahmed@temple.edu](mailto:karim.bahmed@temple.edu)

## Contents

Table E1. Primers used for qPCR.

Table E2. Primers used for RT-PCR.

Table E3. Primers used for CHIP assay.

Figure E1. Purity of freshly isolated ATII cells.

Figure E2. Protein expression in ATII cells.

Figure E3. Mitochondrial swelling in ATII cells.

Figure E4. Decreased MFN2 expression in ATII cells in emphysema.

Figure E5. POL $\gamma$  expression in ATII cells.

Figure E6. TDP1 expression in ATII cells.

Figure E7. Variability in MFN1 expression in mild and severe emphysema.

Figure E8. Low p-DRP1, MFN1, and TDP1 expression in ATII cells in mild and severe emphysema.

Figure E9. Mitochondrial dysfunction in ATII cells in emphysema.

Figure E10. Representative images showing Western blots for figures 1E, 2A, 3A, 4C, 5F, 5E, and E5.

**Table E1. Primers used for qPCR.** Mitochondrial DNA amount (**A**), mitochondrial DNA damage (**B**) and common deletions (**C**) were determined in freshly isolated ATII cells and lung tissue obtained from non-smokers, smokers, and emphysema patients.

**A**

|                            |   |                             |
|----------------------------|---|-----------------------------|
| Short mtDNA fragment       | F | GAATTAAGTAGAAATAACTTTGCAAGG |
|                            | R | CCAGCTATCACCAGGCTC          |
| Short nuclear DNA fragment | F | TGCTGTCTCCATGTTTGATGTATCT   |
|                            | R | TCTCTGCTCCCCACCTCTAAGT      |

**B**

|                      |   |                             |
|----------------------|---|-----------------------------|
| Long mtDNA fragment  | F | ACAAAGAACCCTAACACCAGC       |
|                      | R | TGTTGAGCTTGAACGCTTTC        |
| Short mtDNA fragment | F | GAATTAAGTAGAAATAACTTTGCAAGG |
|                      | R | CCAGCTATCACCAGGCTC          |

**C**

|                      |   |                             |
|----------------------|---|-----------------------------|
| Common deletion      | F | ACCCTATAGCACCCCCTCTAC       |
|                      | R | CTTGTCAGGGAGGTAGCGATG       |
| Short mtDNA fragment | F | GAATTAAGTAGAAATAACTTTGCAAGG |
|                      | R | CCAGCTATCACCAGGCTC          |

**Table E2. Primers used for RT-PCR.** *TDPI*, *MFN1* and *DRP1* mRNA expression were evaluated in freshly isolated ATII cells and lung tissue obtained from non-smokers, smokers, and emphysema patients.

| <b>Gene</b>    |   | <b>Primer's sequence (5'-3')</b> |
|----------------|---|----------------------------------|
| <i>TDPI</i>    | F | TCTCCTTTATTTGGGACGCTTG           |
|                | R | GGATACTGTTTTACGAGCCAGTC          |
| <i>MFN1</i>    | F | GAGGTGCTATCTCGGAGACAC            |
|                | R | GCCAATCCCACTAGGGAGAAC            |
| <i>DRP1</i>    | F | TCAACCTCCGCGTCTACTC              |
|                | R | GATCTGGAACTCGATGTCGGG            |
| <i>GAPDH</i>   | F | GGAGCGAGATCCCTCCAAAAT            |
|                | R | GGCTGTTGTCATACTTCTCATGG          |
| <i>β-actin</i> | F | GGCTGTATTCCCCTCCATCG             |
|                | R | CCAGTTGGTAACAATGCCAT             |

**Table E3. Primers used for CHIP assay.** CHIP assay was performed in lung tissue obtained from non-smokers, smokers and emphysema patients.

|                      |   |                             |
|----------------------|---|-----------------------------|
| Short mtDNA fragment | F | GAATTAAGTAGAAATAACTTTGCAAGG |
|                      | R | CCAGCTATCACCAGGCTC          |
| <i>GAPDH</i>         | F | GGCTCCCTAGGCCCTCCTG         |
|                      | R | TCCCAACTCGGCCCAACA          |

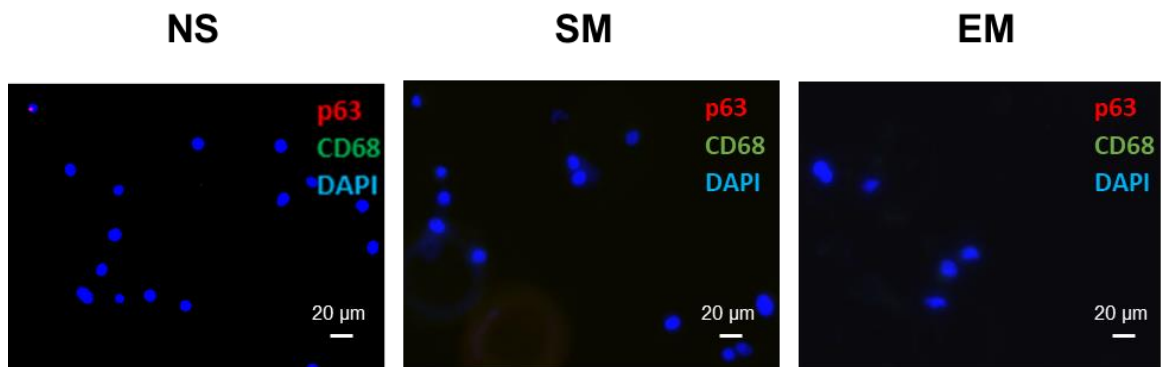

**Figure E1. Purity of freshly isolated ATII cells.** ATII cells were isolated from lung tissue obtained from non-smokers (NS), smokers (SM) and emphysema patients (EM). Cell purity was determined by p63 and CD68 expression by immunocytofluorescence (N=3 lungs per group).

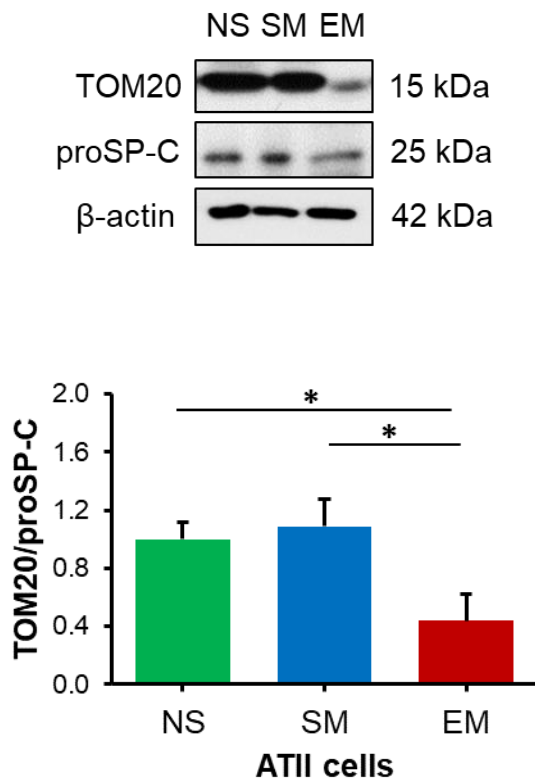

**Figure E2. Protein expression in ATII cells.** ATII cells were isolated from lung tissue obtained from non-smokers (NS), smokers (SM), and emphysema patients (EM). TOM20 and proSP-C expression in ATII cells was determined by Western blotting. Quantification is also shown. Data is expressed as means  $\pm$  s.e.m, N=3 lungs per group, \* $P$ <0.05.

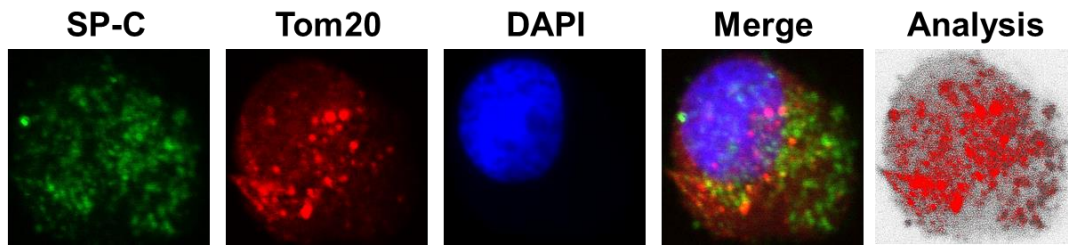

**Figure E3. Mitochondrial swelling in ATII cells.** Representative images of mitochondrial swelling analysis as described in the Materials and Methods section. SP-C and TOM20 were used to identify ATII cells and mitochondria, respectively (N=3 lungs per group).



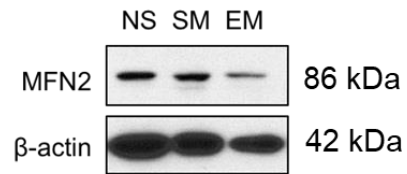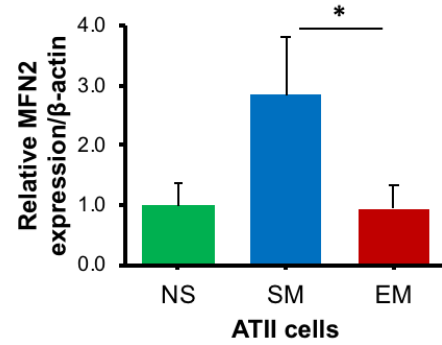

**Figure E4. Decreased MFN2 expression in ATII cells in emphysema.** ATII cells were isolated from lung tissue obtained from non-smokers (NS), smokers (SM) and emphysema patients (EM). MFN2 expression was determined by Western blotting. Quantification is also shown. Data is expressed as means  $\pm$  s.e.m. \* $P < 0.05$ .

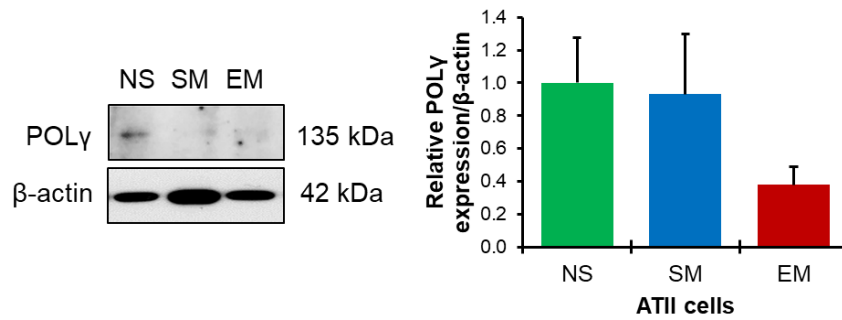

**Figure E5. POL $\gamma$  expression in ATII cells.** ATII cells were isolated from lung tissue obtained from non-smokers (NS), smokers (SM) and emphysema patients (EM). POL $\gamma$  expression was determined by Western blotting. Quantification is also shown. Data is expressed as means  $\pm$  s.e.m.

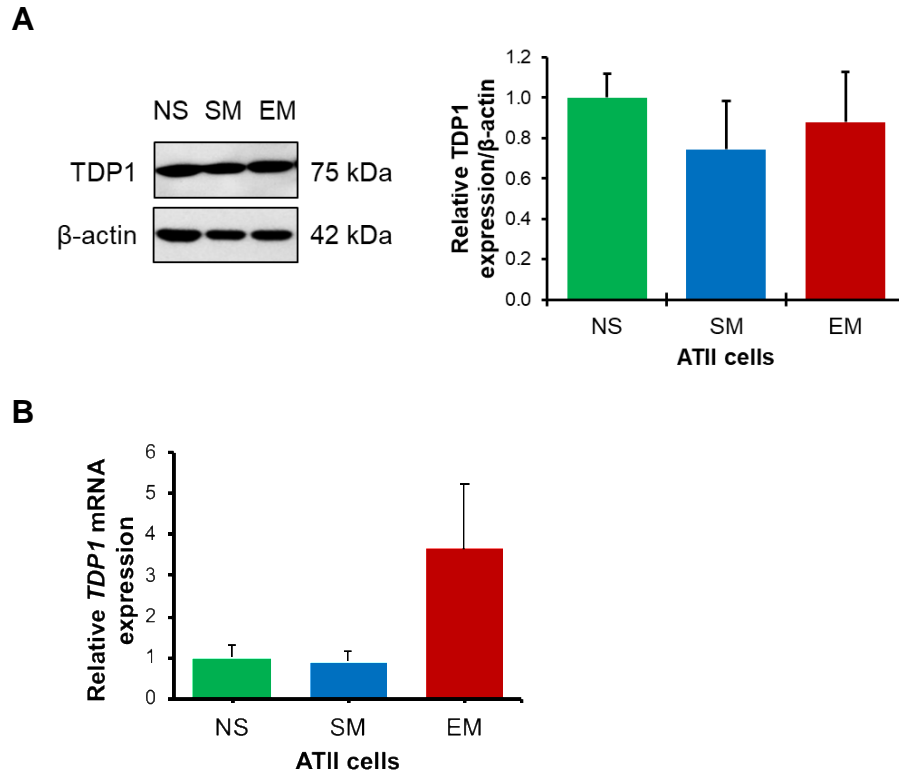

**Figure E6. TDP1 expression in ATII cells.** ATII cells were isolated from lung tissue obtained from non-smokers (NS), smokers (SM) and emphysema patients (EM). **A** – TDP1 expression was determined by Western blotting. Quantification is also shown. **B** – *TDP1* mRNA levels were analyzed by RT-PCR. Data is expressed as means  $\pm$  s.e.m.

**A**

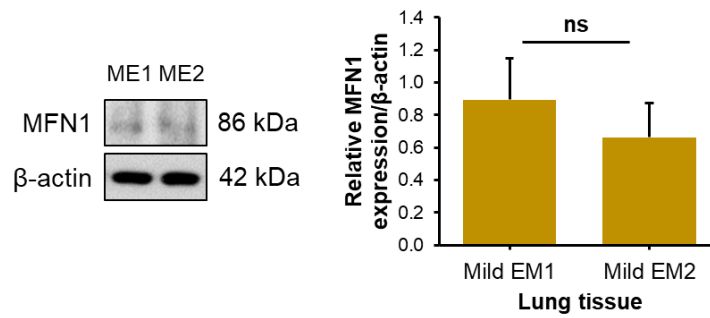

**B**

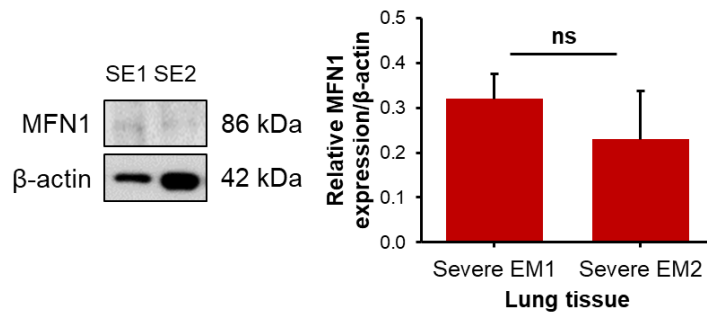

**Figure E7. Variability in MFN1 expression in mild and severe emphysema.** Lung tissue cores were obtained from 2 areas (EM1, EM2) with mild (**A**) and 2 areas with severe emphysema (**B**) from the same patient. MFN1 expression was determined by Western blotting. Quantification is also shown. ns – non-significant, N=3 lungs.

**A**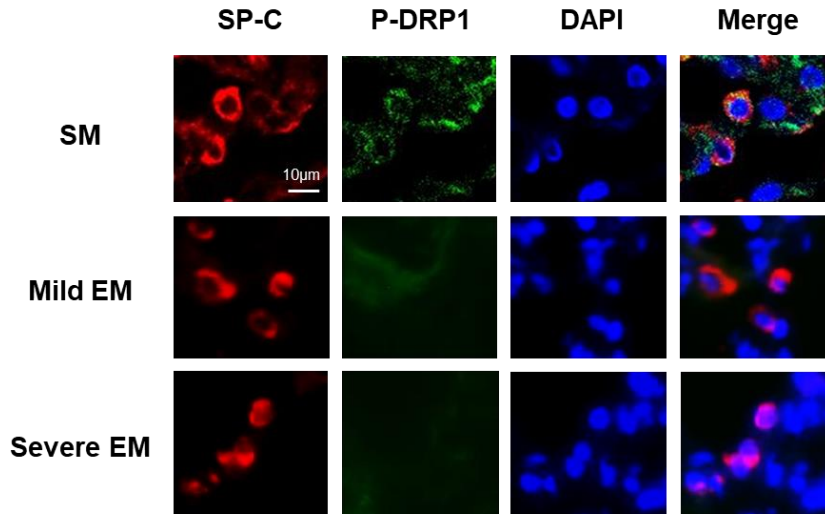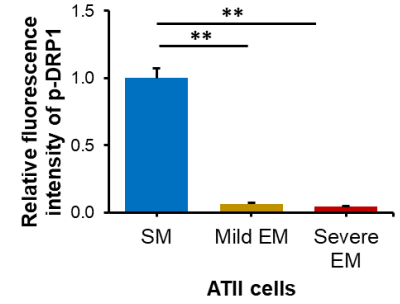**B**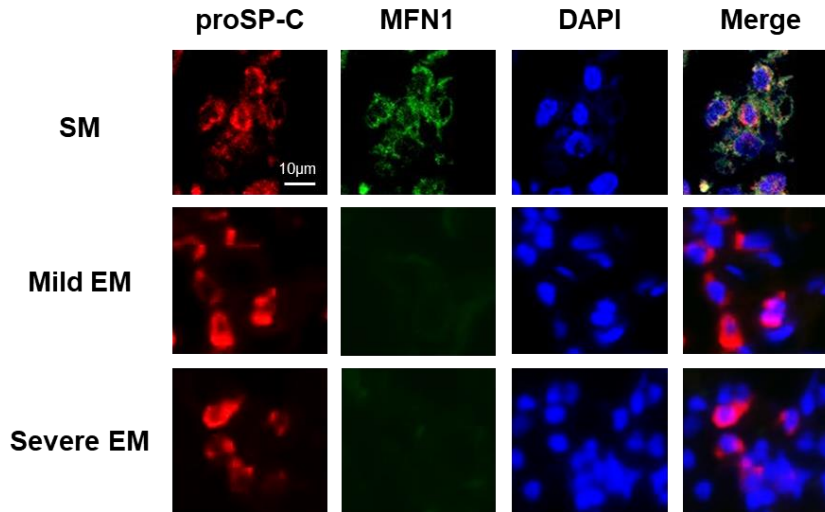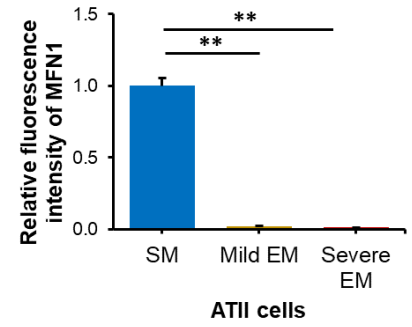**C**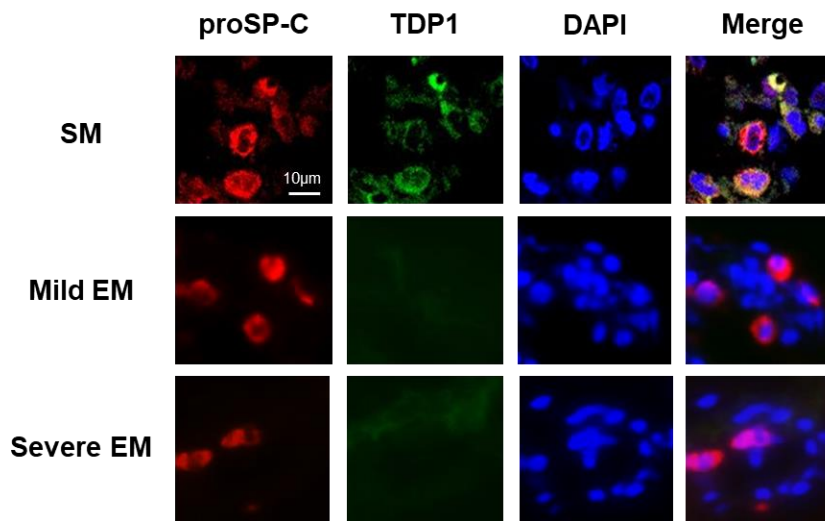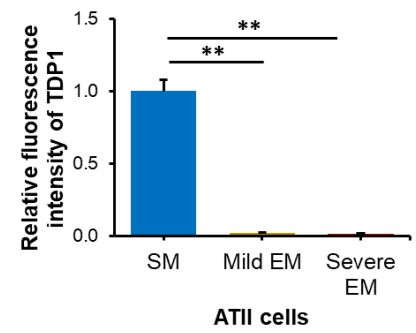

**Figure E8. Low p-DRP1, MFN1, and TDP1 expression in ATII cells in areas with mild and severe emphysema.** Lung sections were obtained from control smokers (SM) and emphysema patients (EM). p-DRP1, MFN1 or TDP1 expression (green) in ATII cells (red) identified using proSP-C or SP-C antibody in lung tissue sections by immunohistofluorescence. Quantification is also shown. Data is expressed as means  $\pm$  s.e.m, N = 3 lungs per group, **\*\* $P < 0.001$** .

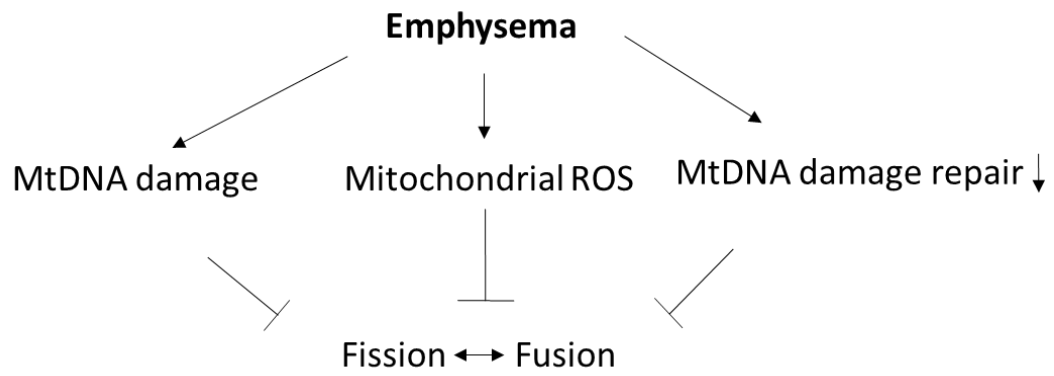

**Figure E9. Mitochondrial dysfunction in ATII cells in emphysema.**

**A**

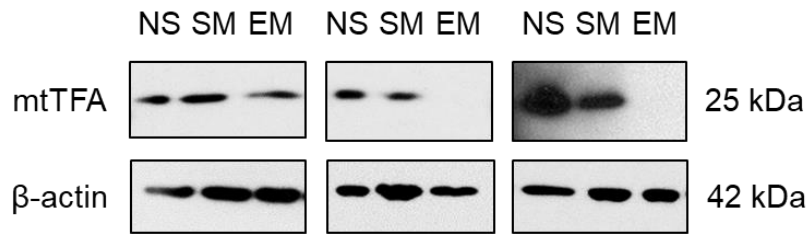

**B**

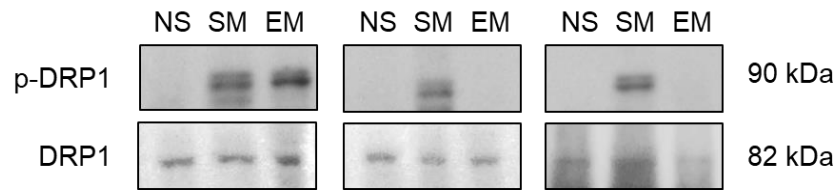

**C**

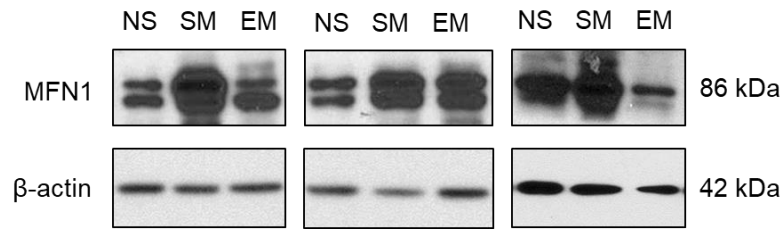

**D**

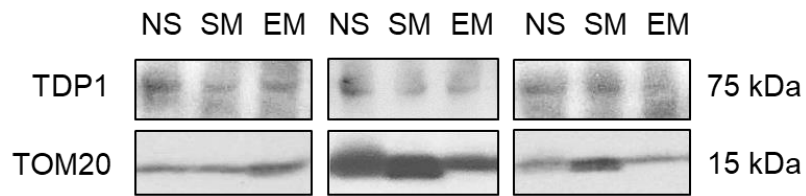

**E**

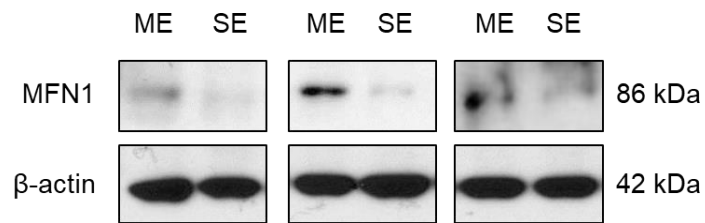



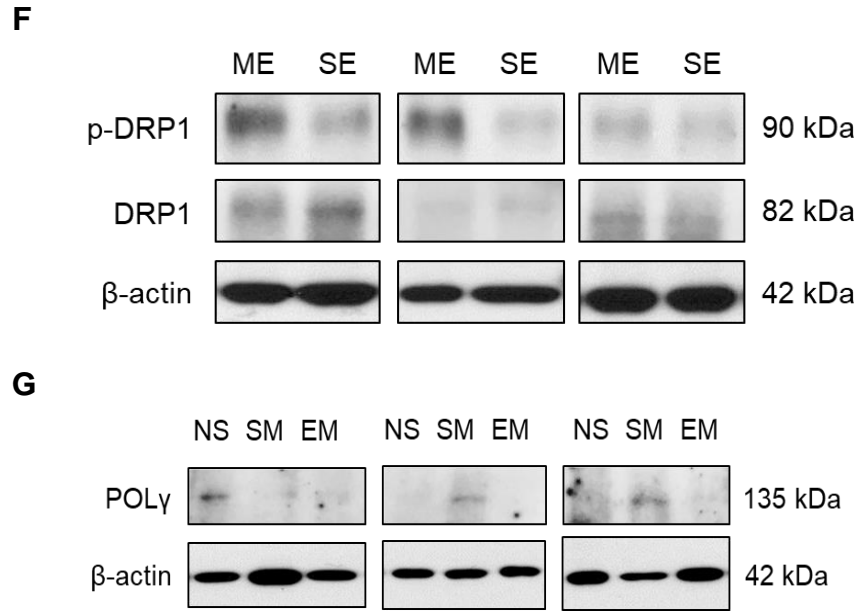

**Figure E10. Representative images showing Western blots for figures 1E (A), 2A (B), 3A (C), 4C (D), 5F (E), 5E (F), and E5 (G).**
